# Supplementary material for: Restorable piezochromism phenomenon in an AIE molecular crystal: combined synchronous Raman scattering
Source: Royal Society of Chemistry journal article supplement (doi:10.1039/c6fd00154h), 2016-07-29
Supplement: c6fd00154h1.pdf [file c6fd00154h1.pdf]

## SUPPORTING INFORMATION

Liqun Liu,<sup>a</sup> Kai Wang,<sup>b</sup> Jian Deng,<sup>a</sup> Zhe Zhang,<sup>c</sup> Yan Wang,<sup>c</sup> \* and Yuguang Ma<sup>a</sup> \*

- a. State Key Laboratory of Luminescent Materials and Devices, South China University of Technology, Guangzhou, 510640, P. R. China.
- b. State Key Laboratory of Superhard Materials, Jilin University, Changchun 130012, China
- c. College of Chemistry, Jilin University, Changchun, 130012, P. R. China.

### S1. The synthetic route of (2Z, 2'Z)-3,3'-(1,4-phenylene)bis(2-(naphthalen-2-yl) acrylonitrile (PBNA))

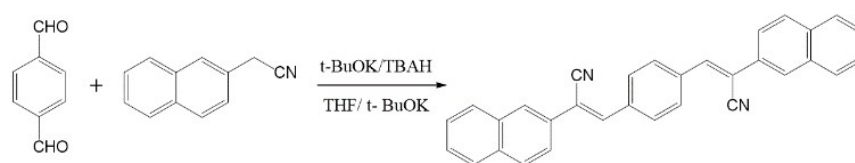

Figure 1. The synthetic scheme of PBNA compound

The compound PBNA was synthesized by a typical Knoevenagel condensation, as shown in Figure 1. All chemicals were purchased commercially and used without further purification. 2-Naphthylacetonitrile (334.42 mg, 2 mmol) and terephthalaldehyde (134.13 mg, 1 mmol) were dissolved in tertiary butanol (10 mL) and tetrahydrofuran, stirred at 50 °C for 30 min under a nitrogen atmosphere. Then, potassium tertbutoxide (1mol/L, 0.25 mL) and tetrabutylammonium hydroxide (TBAH) (1 mol/L, 0.25 mL) were added into the mixture and kept stirring for 20 min. After adding a drop of acetic acid, the resulting precipitate was poured into the methanol acidized and then filtered and purified by dichloromethane. Solid powder PBNA (326 mg) was obtained with the yield of 75 %. The MALDI-TOF MS:  $m/z = 432.60$  ( $[M + H]^+$ ), Calcd. For  $C_{32}H_{20}N_2$ : 432.16.  $^1H$  NMR(500 MHz, 25 °C,  $CDCl_3$ , TMS, ppm):  $\delta$  8.04(s, 2H), 7.66(d, 2H), 7.56(m, 6H), 7.44-7.33(m, 28H), 7.19(s, 2H); FT-IR( KBr pellet,  $cm^{-1}$ ): 3049, 2956, 2240, 1591, 1504, 1465, 1419, 1376, 1339, 1299, 1273, 1205, 1189, 1125, 937, 891, 857, 815, 777, 737, 661.

### S2. The structure and refinement data of crystal G of crystal G

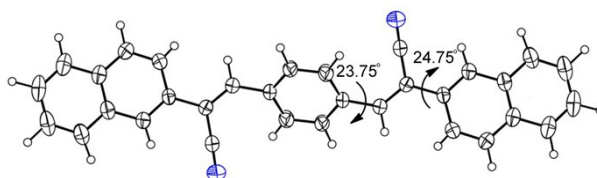

Figure 2. The molecular conformation of PBNA in single crystal G

The crystal G is of the typical monoclinic system, which belongs to the  $C2/c$  space group. The density of the crystal is 1.267  $mg/m^3$ . As shown in the Figure 2, the molecule exhibits the trans-configuration with a torsional main carbon chain. The dihedral angle between central benzene ring and the double bond plane is 23.75°, and the one between naphthalene ring and the plane of

double bond is 24.75°.

Table 1. Refinement data of crystal G

|                     |                                                |                           |        |
|---------------------|------------------------------------------------|---------------------------|--------|
| Identification code | G                                              |                           |        |
| Empirical formula   | C <sub>32</sub> H <sub>20</sub> N <sub>2</sub> | $\gamma/^\circ$           | 90     |
| Formula weight      | 432                                            | Z                         | 4      |
| T/K                 | 298                                            | Density/Mg/m <sup>3</sup> | 1.267  |
| Crystal system      | monoclinic                                     | M(Mo K $\alpha$ )/mm-     | 0.074  |
| space group         | C2/c                                           | Reflections               | 10567  |
| a/Å                 | 46.530                                         | Independent               | 2589   |
| b/Å                 | 6.7629                                         | R1[I>2 $\sigma$ (I)]      | 0.0486 |
| c/Å                 | 7.2639                                         | wR2[I>2 $\sigma$ (I)]     | 0.1476 |
| $\alpha/^\circ$     | 90.00                                          | R1(all data)              | 0.0867 |
| $\beta/^\circ$      | 97.22                                          | wR2(all data)             | 0.1580 |
